# Supplementary material for: Urea-assisted synthesis of carbon-doped BiNbO4 with oxygen vacancies and visible light photocatalytic applications
Source: Royal Society of Chemistry journal article supplement (doi:10.1039/d2ma00585a), 2022-01-01
Supplement: d2ma00585a1.pdf [file d2ma00585a1.pdf]

# Supporting Information

## Urea-Assisted Synthesis of Carbon-Doped BiNbO<sub>4</sub> with Oxygen Vacancies and Visible Light Photocatalytic Applications

Andrei Lebedev,<sup>a</sup> P. Vishakha T. Weerasinghe,<sup>†a</sup> Franklin Anariba,<sup>ab</sup> Xu Li,<sup>cd</sup> Debbie Seng Hwee Leng,<sup>c</sup> and Ping Wu<sup>\*a</sup>

\* Correspondence: [wuping@sutd.edu.sg](mailto:wuping@sutd.edu.sg) (Ping Wu)

<sup>a</sup> Entropic Interface Group, Engineering Product Development, Singapore University of Technology and Design, Singapore; [andrei\\_lebedev@alumni.sutd.edu.sg](mailto:andrei_lebedev@alumni.sutd.edu.sg); [puwakdandawe@mymail.sutd.edu.sg](mailto:puwakdandawe@mymail.sutd.edu.sg).

<sup>b</sup> Anariba Brands Group, Science, Mathematics and Technology, affiliated to Engineering Product Development, Singapore University of Technology and Design, Singapore; [franklin\\_anariba@sutd.edu.sg](mailto:franklin_anariba@sutd.edu.sg).

<sup>c</sup> Institute of Materials Research and Engineering, Agency for Science, Technology and Research (A\*STAR), Singapore; [x-li@imre.a-star.edu.sg](mailto:x-li@imre.a-star.edu.sg); [debbie-seng@imre.a-star.edu.sg](mailto:debbie-seng@imre.a-star.edu.sg).

<sup>d</sup> Institute of Sustainability for Chemicals, Energy and Environment, Agency for Science, Technology and Research (A\*STAR), Singapore, Singapore; [x-li@imre.a-star.edu.sg](mailto:x-li@imre.a-star.edu.sg).

### SI1. Micro-Raman spectra of BiNbO<sub>4</sub> and U-BiNbO<sub>4</sub>.

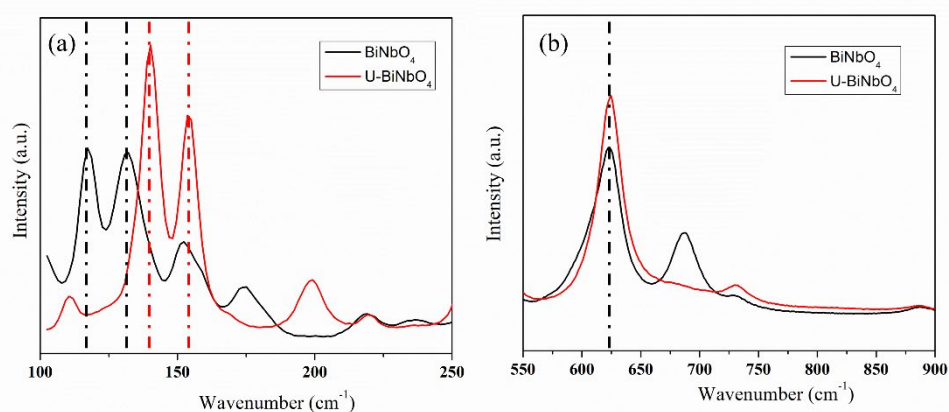

**Figure S1.** Raman spectra in the (a) 100 – 250 cm<sup>-1</sup> and (b) 550 – 900 cm<sup>-1</sup> regions for pristine BiNbO<sub>4</sub> and U-BiNbO<sub>4</sub>.

**S12. XPS spectrum of Bi4f and Nb3d for pristine BiNbO<sub>4</sub> (panels A, C) and U-BiNbO<sub>4</sub> (panels B, D), respectively.**

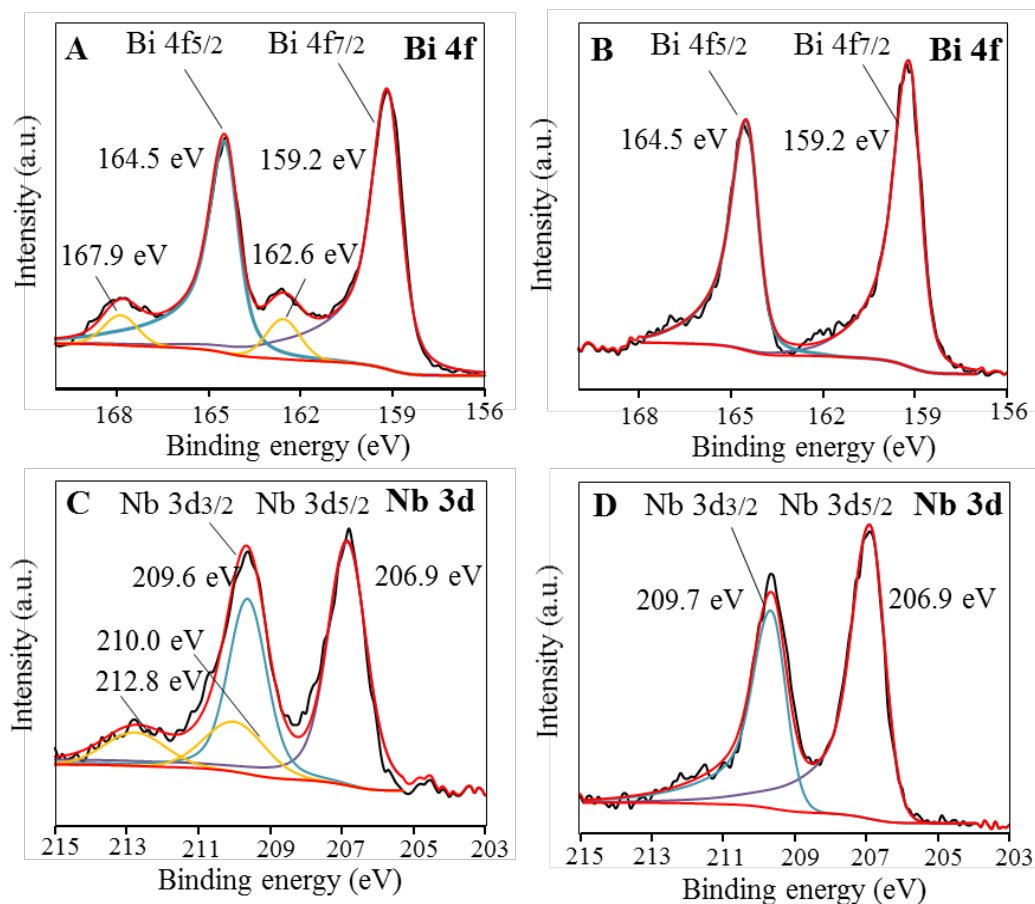

**Figure S2.** XPS spectra of Bi4f and Nb3d for pristine BiNbO<sub>4</sub> (panels A, C) and U-BiNbO<sub>4</sub> (panels B, D), respectively

The Bi4f spectrum of pristine BiNbO<sub>4</sub> suggest the presence of Bi<sup>3+</sup> (with main peaks at 159.2 eV and 164.5 eV, respectively), while the Bi4f spectrum of U-BiNbO<sub>4</sub> also consist of Bi(+3) only (with more predominate peaks at 159.2 eV and 164.5 eV, respectively)<sup>1</sup>. The Nb3d spectrum of pristine BiNbO<sub>4</sub> also propose the presence of two chemical states of Nb(+4) (206.9 eV and 209.6 eV, respectively) and Nb(+5) (210.0 eV and 212.8 eV, respectively), while the U-BiNbO<sub>4</sub> has only Nb(+4) on the surface<sup>2</sup>. Reduced amounts of oxygen at Bi4f and Nb3d chemical states for U-BiNbO<sub>4</sub> catalyst is another evidence of the enhanced presence of surface oxygen vacancies. No traces of nitrogen were detected in both samples.

**SI3. EDS mapping images and spectrum of BiNbO<sub>4</sub> (panels (A) and (C)) and U-BiNbO<sub>4</sub> (panels (B) and (D)), respectively.**

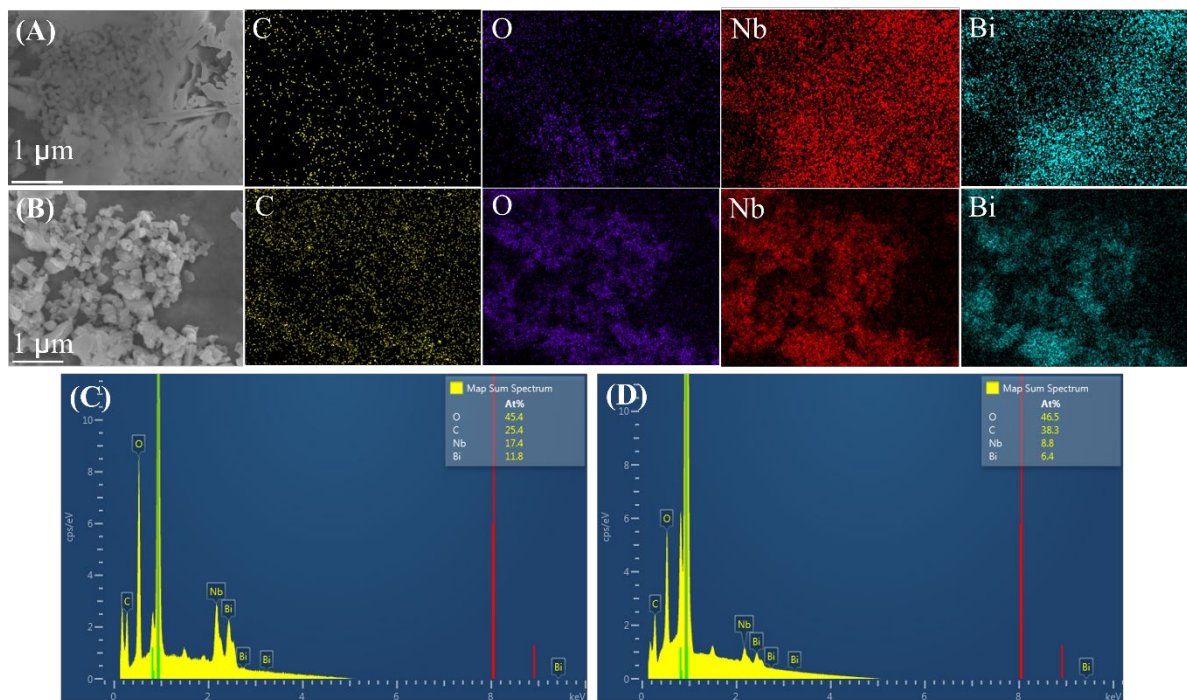

**Figure S3.** EDS mapping and spectral images for pristine BiNbO<sub>4</sub> (panels A and C) and U-BiNbO<sub>4</sub> (panels B and D); EDS spectra taken on Cu substrate indicated by green lines.

#### **SI4. CHNS (Carbon, Hydrogen, Nitrogen and Sulphur) Elemental Analysis**

CHNS elemental analysis was carried out using FLASH EA 1112 Series, CHNS-O Analyzer. Furnace temp is at 950 0C, testing time is 720 sec per sample. The weight percentage of C for BiNbO<sub>4</sub> and U-BiNbO<sub>4</sub> is 0.0385 % and 0.1077 %, respectively.

**Table S1.** Percentage of C and H.

| Sample               | C (wt%) | H(wt%) |
|----------------------|---------|--------|
| BiNbO <sub>4</sub>   | 0.0385  | 0.0763 |
| U-BiNbO <sub>4</sub> | 0.1077  | 0.0865 |

### SI5. Overall XPS survey spectra of U-BiNbO<sub>4</sub>

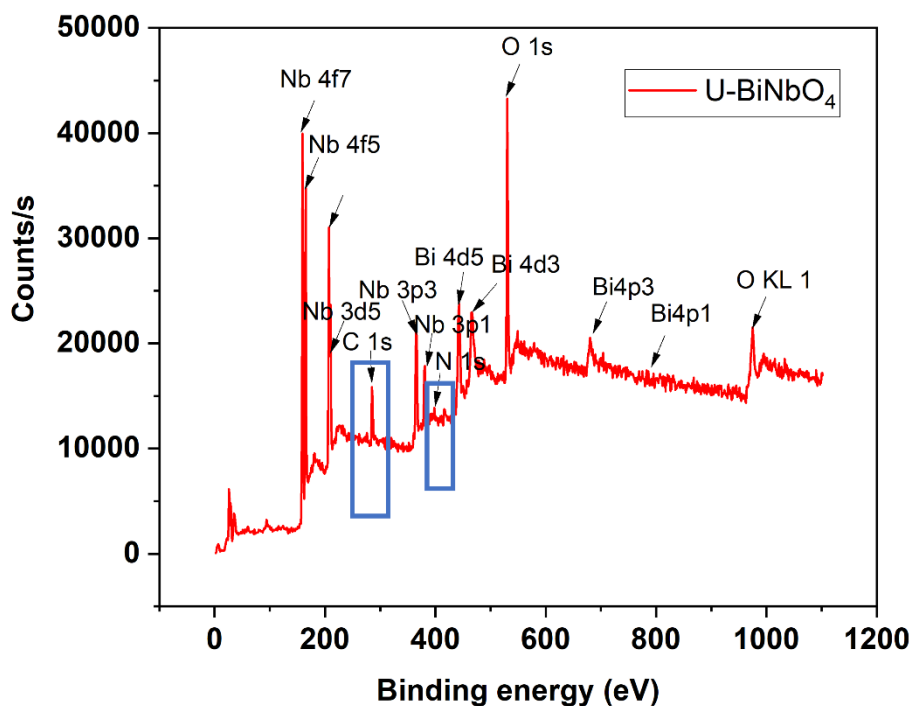

Figure S4: XPS survey spectra of U-BiNbO<sub>4</sub>

### SI6. Characteristic absorption bands of cationic A) MB and B) BG dyes for U-BiNbO<sub>4</sub> catalyst

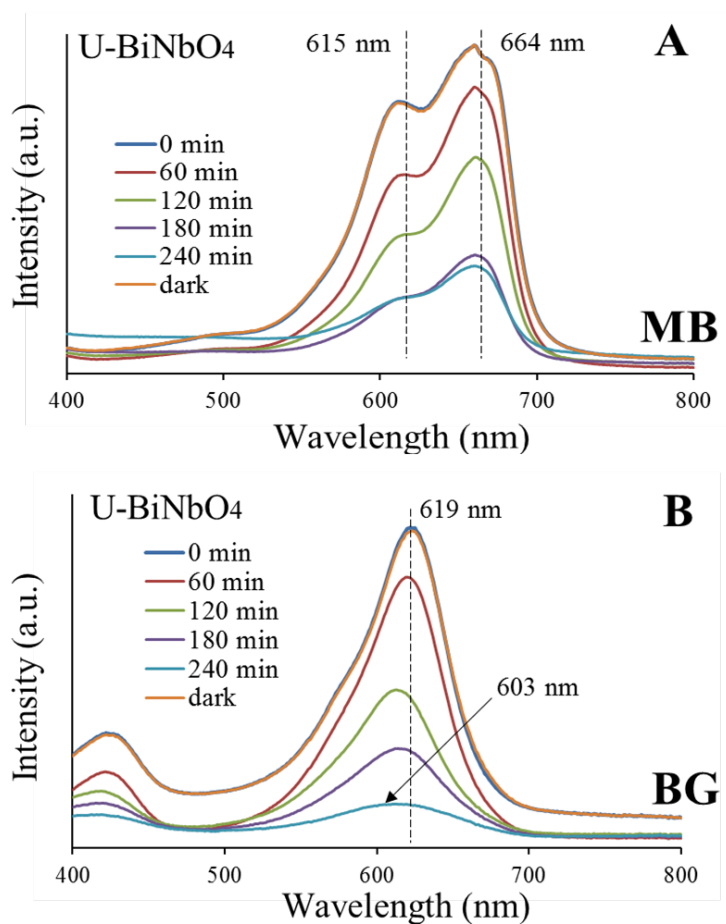

Figure S5: Characteristic absorption bands of cationic A) MB and B) BG dyes for U-BiNbO<sub>4</sub> catalyst.

**SI7. Normalized photocatalytic degradation using 10, 15, 30, and 45 mg of U-BiNbO<sub>4</sub> for A) MB and B) BG dyes.**

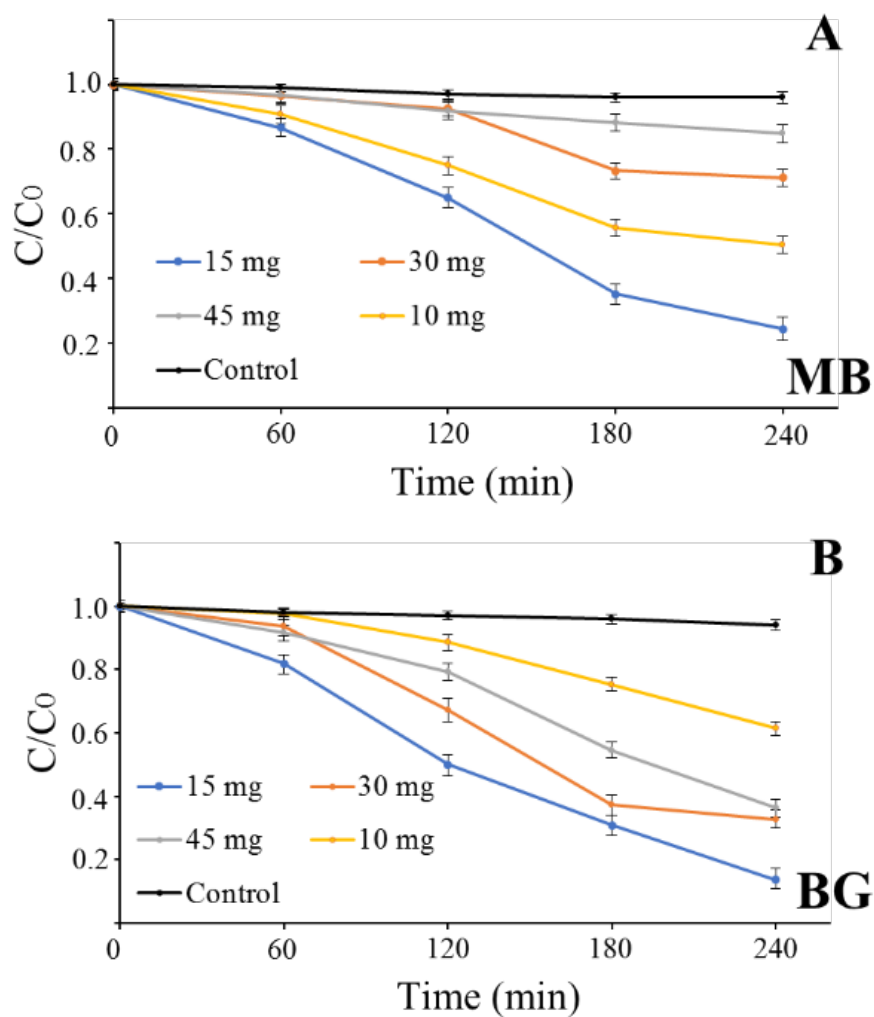

**Figure S6:** Photocatalytic degradation using 10, 15, 30, and 45 mg of U-BiNbO<sub>4</sub> for A) MB and B) BG dyes.

## S18. Normalized photocatalytic degradation of MB in different pH using U-BiNbO<sub>4</sub>

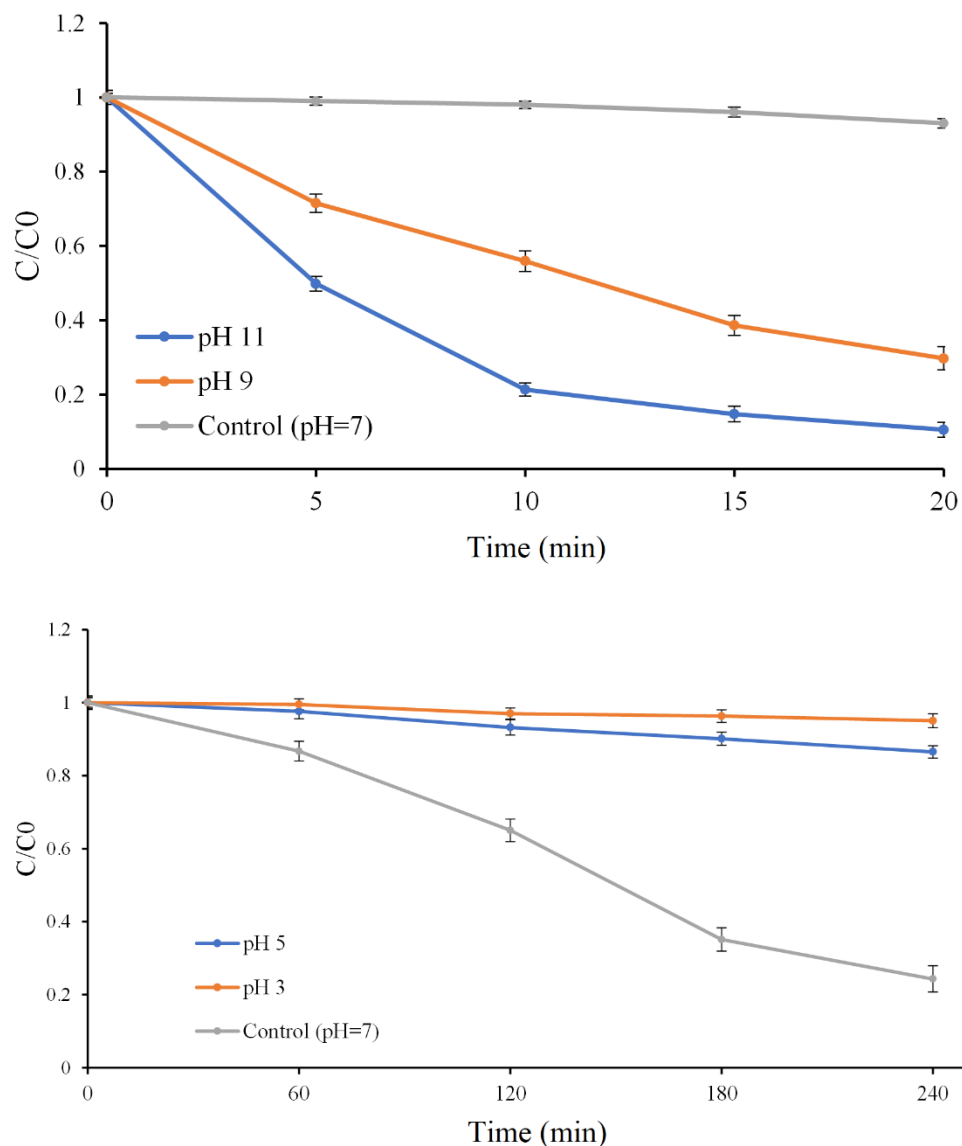

**Figure S7:** Photocatalytic degradation using pH 11.5,9.5,5.5 and 3.5 solutions of U-BiNbO<sub>4</sub> for MB.

## References

1. M. Aslam, M. T. Soomro, I. M. I. Ismail, H. A. Qari, M. A. Gondal and A. Hameed, *RSC Advances*, 2015, **5**, 102663-102673.
2. K. Senevirathne, R. Hui, S. Campbell, S. Ye and J. Zhang, *Electrochimica Acta*, 2012, **59**, 538-547.
